# Supplementary material for: An Analysis Based on Japonica Rice Root Characteristics and Crop Growth Under the Interaction of Irrigation and Nitrogen Methods
Source: Front Plant Sci. 2022 Jun 28;13:890983. doi: 10.3389/fpls.2022.890983 (PMC9277566; doi:10.3389/fpls.2022.890983)
Supplement: Supplementary file 1 [file Table_1.XLSX]

## Sheet: root dry weight
(g m-2)	2019				2020
Treatment	jointing stage	full heading	maturity		jointing stage	full heading	maturity
W1N1	202.36	410.486	320.56		212.53	416.12	316.08
W1N1	214.91	430.92	333.62		220.76	410.56	319.792
W1N1	190.32	390.23	306.83		203.74	422.616	313.488
W2N1	189.74	422.04	315.425		186.275	429.794	310.292
W2N1	176.12	410.81	300.87		192.67	440.364	320.38
W2N1	202.72	434.87	329.45		179.35	419.364	300.834
W3N1	173.405	380.524	260.305		177.305	383.524	261.882
W3N1	162.98	391.11	250.43		166.65	394.24	256.672
W3N1	183.25	369.608	270.32		187.36	372.608	267.192
W1N2	229.32	451.32	353.82		232.79	451.012	345.556
W1N2	216.05	444.82	344.07		228.23	459.552	352.38
W1N2	203.83	438.37	334.15		224.8	467.282	360.604
W2N2	195.22	453.61	349.775		203.69	461.998	353.014
W2N2	205.92	463.32	362.53		197.23	453.508	352.492
W2N2	185.63	443.06	337.32		209.81	470.288	353.836
W3N2	167.92	403.73	278.32		150.59	391.988	299.82
W3N2	154.16	391.77	286.375		160.78	399.058	288.248
W3N2	140.32	379.83	294.23		170.97	406.908	277.536
W1N3	189.54	453.2	359.54		181.88	454.62	365.84
W1N3	183.785	435.67	340.23		186.51	443.314	357.96
W1N3	178.43	417.34	322.32		191.54	431.808	350.28
W2N3	181.43	459.23	372.2		176.93	459.032	378.552
W2N3	163.06	422.11	354.12		186.41	437.656	358.898
W2N3	172.375	440.83	363.25		181.77	448.094	368.43
W3N3	144.32	377.34	279.6		137.58	374.652	264.564
W3N3	134.33	360.93	270.79		140.67	367.124	271.61
W3N3	124.84	343.32	261.28		143.16	360.996	278.06

## Sheet: Root morphology parameters
Root length density	(cm cm-3)
	2019				2020
	jointing stage	full heading	maturity		jointing stage	full heading	maturity
W1N1	1.05942	1.60875	0.884052		1.06496	1.65812	0.969378
W1N1	1.031	1.59019	0.917109		1.12725	1.64721	1.00011
W1N1	1.10995	1.67699	0.858669		1.11709	1.73408	0.947129
W2N1	0.919215	1.48654	0.820869		0.948533	1.51087	0.88156
W2N1	0.880789	1.37508	0.837045		0.906072	1.38772	0.890935
W2N1	0.957641	1.40282	0.804693		0.990993	1.41837	0.863686
W3N1	0.68298	1.10471	0.619457		0.698792	1.14645	0.69075
W3N1	0.746688	1.08648	0.607608		0.76919	1.17106	0.677656
W3N1	0.724834	1.00611	0.626972		0.723991	1.127	0.699054
W1N2	0.956456	1.82901	1.05286		0.966634	1.9029	1.13891
W1N2	1.0233	1.8152	1.10076		1.05099	1.8545	1.17184
W1N2	0.989875	1.89362	1.00496		1.01881	2.00745	1.10598
W2N2	0.86569	1.72027	0.965991		0.875887	1.85005	1.05042
W2N2	0.837865	1.65104	1.02979		0.845141	1.7904	1.10091
W2N2	0.907426	1.63205	0.933144		0.922006	1.78627	1.03412
W3N2	0.65557	1.4521	0.803325		0.715304	1.48382	0.857024
W3N2	0.616175	1.37588	0.845651		0.671774	1.44515	0.903794
W3N2	0.633872	1.35371	0.775108		0.691539	1.37275	0.825844
W1N3	0.757171	1.78091	1.1368		0.795423	1.89201	1.20142
W1N3	0.766636	1.72653	1.19482		0.805883	1.85142	1.24553
W1N3	0.747705	1.83529	1.07878		0.784964	1.9326	1.1573
W2N3	0.702262	1.58087	1.00134		0.7116	1.71146	1.10223
W2N3	0.685449	1.56109	1.06183		0.693021	1.62386	1.16907
W2N3	0.719076	1.4814	0.96102		0.730179	1.6358	1.05768
W3N3	0.657283	1.30283	0.838897		0.664048	1.32908	0.895631
W3N3	0.649962	1.24382	0.866595		0.645458	1.26387	0.926237
W3N3	0.664605	1.31492	0.811198		0.682638	1.34244	0.865024
Root surface area density	(cm cm-3)
	jointing stage	full heading	maturity		jointing stage	full heading	maturity
W1N1	0.151393	0.215998	0.159491		0.168383	0.232078	0.178548
W1N1	0.148961	0.202365	0.168248		0.16527	0.223427	0.185357
W1N1	0.154432	0.216126	0.151216		0.172273	0.236642	0.172357
W2N1	0.128193	0.204264	0.140057		0.145375	0.229458	0.157272
W2N1	0.130012	0.186977	0.145611		0.149826	0.20173	0.165502
W2N1	0.126374	0.197279	0.134502		0.140924	0.217718	0.150043
W3N1	0.105576	0.155629	0.112486		0.127478	0.172005	0.128723
W3N1	0.109227	0.146896	0.109948		0.13315	0.158026	0.125414
W3N1	0.107401	0.147588	0.112208		0.129844	0.156112	0.128366
W1N2	0.144497	0.22848	0.177974		0.162956	0.238855	0.193807
W1N2	0.141797	0.235428	0.180941		0.159501	0.256708	0.203445
W1N2	0.144147	0.229662	0.175008		0.162228	0.231408	0.18417
W2N2	0.117213	0.226291	0.172368		0.142192	0.259253	0.189431
W2N2	0.119353	0.216049	0.180022		0.147492	0.243342	0.199948
W2N2	0.113002	0.221395	0.172627		0.134243	0.247386	0.189043
W3N2	0.0985352	0.185607	0.132769		0.120925	0.215176	0.162344
W3N2	0.0917067	0.185153	0.138345		0.114185	0.202115	0.172281
W3N2	0.0971209	0.188221	0.132385		0.116555	0.204523	0.159053
W1N3	0.115368	0.187952	0.160601		0.142871	0.220179	0.185569
W1N3	0.118138	0.179924	0.165002		0.148976	0.207102	0.192603
W1N3	0.112598	0.195981	0.1562		0.136766	0.233256	0.178536
W2N3	0.104074	0.173062	0.130395		0.108447	0.194219	0.140106
W2N3	0.107551	0.171237	0.138614		0.110776	0.180683	0.153426
W2N3	0.100597	0.159074	0.128249		0.106118	0.170715	0.134559
W3N3	0.0804243	0.137991	0.115162		0.0929631	0.145029	0.124168
W3N3	0.0784586	0.14065	0.122009		0.0904471	0.148433	0.132871
W3N3	0.0823899	0.129635	0.108315		0.0954791	0.134333	0.115344
Root volume density			(cm cm-3)
	jointing stage	full heading	maturity		jointing stage	full heading	maturity
W1N1	0.232793	0.386844	0.231879		0.256219	0.436833	0.255868
W1N1	0.240788	0.37243	0.233592		0.260293	0.409547	0.255826
W1N1	0.222799	0.401258	0.218463		0.249627	0.411417	0.241164
W2N1	0.177194	0.360326	0.21922		0.198364	0.379752	0.230117
W2N1	0.18201	0.324786	0.221656		0.201993	0.347493	0.230987
W2N1	0.172378	0.324112	0.216784		0.194736	0.371523	0.229248
W3N1	0.137216	0.267279	0.177541		0.160592	0.280472	0.181802
W3N1	0.136574	0.237463	0.167102		0.159783	0.267704	0.168649
W3N1	0.136895	0.239475	0.172814		0.160188	0.265039	0.175846
W1N2	0.215524	0.404423	0.30795		0.22746	0.399031	0.336117
W1N2	0.208874	0.344355	0.315542		0.215881	0.414778	0.341283
W1N2	0.214199	0.379331	0.300358		0.220671	0.403155	0.330951
W2N2	0.170978	0.386549	0.268232		0.185532	0.424083	0.288672
W2N2	0.172363	0.353328	0.281818		0.184918	0.403128	0.30879
W2N2	0.1619	0.376208	0.270543		0.176454	0.392672	0.288584
W3N2	0.133096	0.329066	0.219014		0.165801	0.369343	0.231298
W3N2	0.121816	0.300431	0.233335		0.151068	0.330263	0.243142
W3N2	0.126456	0.297235	0.219467		0.157435	0.338836	0.228068
W1N3	0.160664	0.325818	0.289624		0.174236	0.358523	0.318626
W1N3	0.16534	0.346252	0.291178		0.178948	0.345162	0.325784
W1N3	0.155988	0.321154	0.28807		0.169525	0.371885	0.311468
W2N3	0.133524	0.311891	0.263901		0.15264	0.351711	0.278815
W2N3	0.134774	0.299387	0.284533		0.156815	0.33653	0.296611
W2N3	0.132274	0.289025	0.260147		0.148465	0.320882	0.281085
W3N3	0.110246	0.279329	0.200636		0.1181	0.311655	0.226101
W3N3	0.118326	0.284105	0.20713		0.127191	0.320273	0.234284
W3N3	0.102166	0.265605	0.196142		0.136829	0.291762	0.219919

## Sheet: Root bleeding sap
	(g h-1 plant-1)
Transplanting (d)	W1N1	W1N2	W1N3	W2N1	W2N2	W2N3	W3N1	W3N2	W3N3
20	0.59117	0.355	0.30725	0.45	0.31308	0.28325	0.282	0.29158	0.35158
20	0.46692	0.51233	0.50233	0.34792	0.41308	0.40775	0.30842	0.26033	0.14267
20	0.52904	0.43367	0.40479	0.39896	0.36308	0.3455	0.29521	0.27596	0.24713
20	0.52375	0.43742	0.41525	0.41983	0.40833	0.33842	0.35825	0.31067	0.28258
20	0.48925	0.41833	0.3645	0.35867	0.39508	0.35608	0.3825	0.30925	0.29742
20	0.5065	0.42788	0.38988	0.38925	0.40171	0.34725	0.37038	0.30996	0.29
30	0.93117	0.655	0.59725	0.76	0.60308	0.56325	0.582	0.57158	0.62158
30	0.80692	0.81233	0.79233	0.65792	0.70308	0.68775	0.60842	0.54033	0.41267
30	0.86904	0.73367	0.69479	0.70896	0.65308	0.6255	0.59521	0.55596	0.51713
30	0.86375	0.74742	0.71525	0.73983	0.70733	0.61842	0.65825	0.59067	0.53258
30	0.82925	0.72833	0.6645	0.67867	0.69408	0.63608	0.6825	0.58925	0.54742
30	0.8465	0.73788	0.68988	0.70925	0.70071	0.62725	0.67038	0.58996	0.54
40	1.41233	1.13	1.0245	1.0165	0.98617	0.95	0.834	0.83317	0.71317
40	1.30383	1.28467	1.11467	1.2055	1.12617	0.88583	0.88683	0.77067	0.69533
40	1.35808	1.20733	1.06958	1.111	1.05617	0.91792	0.86042	0.80192	0.70425
40	1.531	1.25167	1.10483	1.19833	1.0865	1.0135	1.00567	0.9395	0.79433
40	1.41983	1.27083	1.18367	1.1295	0.99217	0.96317	0.954	0.87867	0.826
40	1.47542	1.26125	1.14425	1.16392	1.03933	0.98833	0.97983	0.90908	0.81017
50	1.49008	1.3525	1.21783	1.28642	1.18058	1.04333	0.87325	0.93158	0.8185
50	1.485	1.35717	1.19042	1.18217	1.26742	1.07908	0.98708	0.95242	0.79692
50	1.48754	1.35483	1.20413	1.23429	1.224	1.06121	0.93017	0.942	0.80771
50	1.58592	1.33443	1.24458	1.29336	1.20572	1.1838	1.11891	1.17153	0.90181
50	1.56303	1.28704	1.33157	1.3484	1.26903	1.12635	1.21354	1.06896	0.98932
50	1.57447	1.31074	1.28808	1.32088	1.23738	1.15508	1.16623	1.12025	0.94556
60	1.63017	1.585	1.45567	1.57283	1.48117	1.26667	1.1967	1.12317	1.047
60	1.62	1.59433	1.40083	1.44433	1.45483	1.33817	1.02437	1.16483	1.00383
60	1.62508	1.58967	1.42825	1.50858	1.468	1.30242	1.11053	1.144	1.02542
60	1.67183	1.64887	1.41917	1.46672	1.42143	1.4176	1.25307	1.20782	1.05362
60	1.62605	1.55408	1.51313	1.5768	1.50807	1.3027	1.16792	1.29708	1.14863
60	1.64894	1.60148	1.46615	1.52176	1.46475	1.36015	1.21049	1.25245	1.10113
70	1.32442	1.26792	1.14475	1.16133	1.31767	1.2965	1.156	1.05442	0.97192
70	1.36658	1.24708	1.13608	1.37133	1.31142	1.24017	1.06558	1.11808	1.00775
70	1.3455	1.2575	1.14042	1.26633	1.31454	1.26833	1.11079	1.08625	0.98983
70	1.48248	1.48508	1.24803	1.36205	1.52693	1.32552	1.27039	1.12673	1.00725
70	1.39158	1.52173	1.27027	1.40003	1.31391	1.28163	1.19633	1.11213	0.96325
70	1.43703	1.50341	1.25915	1.38104	1.42042	1.30358	1.23336	1.11943	0.98525
80	0.99953	1.13433	1.0358	0.82907	1.05413	1.0372	0.8248	1.00353	0.73753
80	1.03327	1.11767	1.02887	0.99707	1.04913	0.99213	0.75247	1.05447	0.7662
80	1.0164	1.126	1.03233	0.91307	1.05163	1.01467	0.78863	1.029	0.75187
80	1.19598	1.21807	1.04842	0.87964	1.14154	1.11041	0.99631	1.01138	0.9258
80	1.12327	1.24739	1.06621	0.91003	0.97113	1.07531	0.93707	0.99971	0.8906
80	1.15962	1.23273	1.05732	0.89483	1.05633	1.09286	0.96669	1.00554	0.9082
90	0.70495	0.87335	0.78769	0.59817	0.7698	0.7174	0.56238	0.67405	0.58907
90	0.74838	0.8519	0.77877	0.69087	0.76336	0.65937	0.46925	0.73963	0.62598
90	0.72667	0.86263	0.78323	0.64452	0.76658	0.68838	0.51582	0.70684	0.60753
90	0.97805	1.09404	1.05377	0.76011	1.04117	0.88728	0.7172	0.82673	0.78607
90	0.88443	1.13179	1.07667	0.79923	0.95773	0.84208	0.64092	0.8117	0.74075
90	0.93124	1.11291	1.06522	0.77967	0.99945	0.86468	0.67906	0.81921	0.76341
100	0.68442	0.84792	0.76475	0.56133	0.73767	0.6965	0.546	0.65442	0.57192
100	0.72658	0.82708	0.75608	0.65133	0.73142	0.64017	0.45558	0.71808	0.60775
100	0.7055	0.8375	0.76042	0.60633	0.73454	0.66833	0.50079	0.68625	0.58983
100	0.85248	0.96508	0.85803	0.60205	0.87493	0.72552	0.56039	0.66673	0.62725
100	0.76158	1.00173	0.88027	0.64003	0.79391	0.68163	0.48633	0.65213	0.58325
100	0.80703	0.98341	0.86915	0.62104	0.83442	0.70358	0.52336	0.65943	0.60525

## Sheet: Root-shoot ratio
	2019				2020
	jointing stage	full heading	maturity		jointing stage	full heading	maturity
W1N1	0.506103	0.509286	0.226013		0.476637	0.501946	0.206592
W1N1	0.467092	0.463662	0.209761		0.45884	0.522378	0.21244
W1N1	0.485784	0.48482	0.217924		0.467733	0.512106	0.209446
W2N1	0.557321	0.550418	0.266742		0.540657	0.547157	0.238074
W2N1	0.507141	0.523924	0.239056		0.565708	0.549482	0.236435
W2N1	0.526721	0.537221	0.25278		0.551369	0.548345	0.237225
W3N1	0.559638	0.586089	0.228761		0.511316	0.569992	0.217225
W3N1	0.547644	0.570406	0.233945		0.534434	0.544661	0.222904
W3N1	0.553216	0.578366	0.231423		0.523448	0.557399	0.220085
W1N2	0.508148	0.533169	0.215768		0.536395	0.525191	0.214864
W1N2	0.481306	0.503189	0.212564		0.512956	0.532128	0.220836
W1N2	0.493465	0.517964	0.214199		0.524618	0.528698	0.217871
W2N2	0.606932	0.569857	0.247502		0.567279	0.56742	0.238632
W2N2	0.579521	0.557974	0.226045		0.585395	0.59421	0.234349
W2N2	0.592257	0.56398	0.236669		0.575744	0.580746	0.236468
W3N2	0.605747	0.568518	0.221723		0.602271	0.565408	0.224032
W3N2	0.568849	0.551965	0.223475		0.627243	0.566339	0.204124
W3N2	0.586709	0.560372	0.22262		0.615137	0.565882	0.213999
W1N3	0.465714	0.569845	0.232283		0.482917	0.548449	0.225865
W1N3	0.452585	0.529044	0.213007		0.456212	0.540678	0.227515
W1N3	0.458413	0.549528	0.222754		0.46884	0.544637	0.226669
W2N3	0.5204	0.631756	0.275732		0.501781	0.608783	0.276863
W2N3	0.505651	0.583624	0.257301		0.480663	0.588604	0.252726
W2N3	0.513092	0.607742	0.266425		0.489748	0.597915	0.264576
W3N3	0.560503	0.601124	0.244994		0.51915	0.573968	0.202408
W3N3	0.531022	0.556396	0.221085		0.546127	0.532813	0.221767
W3N3	0.544332	0.577655	0.232815		0.532565	0.553007	0.211896

## Sheet: Leaf area duration
	2019			2020
	(m2 m-2 d)
Treatment	JS-FS	FS-MS		JS-FS	FS-MS
W1N1	194.471	216.06		211.42	234.93
W1N1	191.194	207.423		209.715	229.395
W1N1	192.343	210.604		207.7	228.78
W2N1	178.673	199.421		192.9	216.3
W2N1	178.144	195.914		190.95	217.56
W2N1	175.658	195.731		187.95	211.47
W3N1	143.254	165.123		163.05	188.37
W3N1	143.94	169.059		164.1	190.05
W3N1	142.89	170.262		164.1	193.41
W1N2	185.894	234.656		212.464	257.25
W1N2	185.959	231.145		212.774	256.2
W1N2	183.9	231.099		209.983	255.15
W2N2	169.631	233.151		186.905	258.75
W2N2	167.856	232.252		185.89	254.84
W2N2	166.432	227.405		186.035	256.68
W3N2	133.529	199.635		147.15	210.76
W3N2	135.596	202.024		149.985	214.94
W3N2	132.773	198.842		149.985	214.94
W1N3	179.236	241.783		192.445	264
W1N3	179.901	240.699		190.27	259.16
W1N3	175.049	231.966		191.285	262.68
W2N3	157.114	221.396		162.54	247.925
W2N3	154.906	220.865		163.62	248.16
W2N3	158.633	228.078		163.215	250.51
W3N3	129.388	191.464		140.27	209.44
W3N3	129.152	193.184		136.5	202.4
W3N3	127.474	186.996		137.15	204.38

## Sheet: Leaf relative water content
	2019				2020
	(%)
Treatment	jointing stage	full heading	maturity		jointing stage	full heading	maturity
W1N1	74.2405	86.7	83.0838		74.3741	87.1847	81.6352
W1N1	73.8649	83.8615	81.6415		74.0136	84.1909	80.2582
W1N1	74.0527	85.2808	82.3627		74.1939	85.6878	80.9467
W2N1	82.2783	86.93	83.9583		78.5481	84.6051	85.0118
W2N1	81.7754	86.6005	84.2543		77.8932	84.3447	85.558
W2N1	81.2725	86.271	84.5503		77.2383	84.0843	86.1041
W3N1	73.9945	76.3966	76.5534		72.9798	75.4597	74.15
W3N1	74.4019	77.9587	75.5164		73.3739	76.9902	74.0072
W3N1	74.8093	79.5208	74.4795		73.7681	78.5207	73.8644
W1N2	71.0388	90.7688	92.1721		70.0373	90.9063	90.8229
W1N2	72.2597	89.2462	91.5476		71.2869	89.4966	90.2449
W1N2	73.4805	87.7236	90.9232		72.5365	88.087	89.6669
W2N2	81.9153	90.8147	90.966		79.9857	88.6577	94.5786
W2N2	82.2343	91.9917	89.2741		80.3229	89.625	93.3086
W2N2	82.5532	93.1688	87.5822		80.6602	90.5923	92.0386
W3N2	70.3861	86.8461	83.4269		69.402	85.7523	82.2612
W3N2	71.454	85.4651	82.7375		70.4748	84.3977	81.5841
W3N2	72.522	84.0841	82.0481		71.5476	83.0431	80.9071
W1N3	73.9713	81.2464	82.6657		71.6731	81.6524	85.9745
W1N3	74.3054	82.1474	84.2992		71.9676	82.643	86.0136
W1N3	74.6395	83.0484	85.9326		72.262	83.6336	86.0528
W2N3	69.8802	80.2504	89.6105		69.4009	76.8815	90.3489
W2N3	69.3183	81.5115	87.9839		68.873	77.9552	89.7633
W2N3	68.7564	82.7726	86.3572		68.3451	79.0288	89.1776
W3N3	64.2775	74.9116	79.5802		61.8171	72.7671	78.4717
W3N3	63.5626	75.9388	79.8753		60.0306	73.7561	78.7607
W3N3	62.8478	76.9659	80.1703		58.2441	74.7451	79.0496

## Sheet: Crop growth rate
	2019			2020
	(g m-2 d-1)
Treatment	JS-FS	FS-MS		JS-FS	FS-MS
W1N1	22.5446	12.8152		18.5153	13.5975
W1N1	21.4369	14.4783		17.8739	15.5911
W1N1	21.9907	13.6468		18.1946	14.5943
W2N1	22.7572	8.61763		22.9827	9.63577
W2N1	23.7389	8.34422		22.7891	8.9373
W2N1	21.7754	8.89103		23.1762	10.3342
W3N1	20.8661	7.97141		21.0756	8.36326
W3N1	19.9289	8.46405		20.4587	9.05262
W3N1	19.0033	8.95669		19.8418	9.74198
W1N2	24.2196	16.1259		22.6236	15.3911
W1N2	24.0053	16.5839		21.9875	15.3627
W1N2	23.791	17.0418		21.3358	15.3343
W2N2	26.8576	13.7241		24.3228	13.0518
W2N2	28.0424	12.7769		23.9563	12.5287
W2N2	27.4402	13.2505		24.1396	12.7903
W3N2	26.3669	10.9508		22.3856	12.098
W3N2	25.9175	11.3628		22.5575	11.6314
W3N2	26.8317	10.5388		22.2137	12.5645
W1N3	22.7188	15.3492		22.7991	14.9623
W1N3	23.7273	15.7098		23.6722	15.4524
W1N3	24.6951	16.0705		24.5445	15.9424
W2N3	25.3855	13.6059		25.3844	12.1298
W2N3	25.7809	13.0346		26.1274	11.9881
W2N3	26.1547	12.4633		26.8704	11.8464
W3N3	23.7008	10.781		24.3549	11.2877
W3N3	23.5846	10.4603		24.1929	11.8286
W3N3	23.4825	10.1395		24.0308	12.3695

## Sheet: yield and use efficiency
	grain yield	WUE	NUpE	NUtE
	(kg ha-1)	(kg m-3)	(g g-1)	(g g-1)
W1N1	7365.54	1.25286	0.38827	48.1473
W1N1	7158.64	1.22558	0.37032	39.9666
W1N1	7262.09	1.23922	0.3793	44.0569
W1N1	7409.2	1.21542	0.36288	54.1545
W1N1	7200.23	1.18855	0.35051	44.919
W1N1	7304.71	1.20198	0.3567	49.5367
W1N2	8425.62	1.33825	0.4618	51.4535
W1N2	8542.73	1.36103	0.43799	53.2607
W1N2	8659.84	1.3838	0.41419	55.0678
W1N2	8494.88	1.31317	0.46264	58.1219
W1N2	8731.44	1.35771	0.45765	56.7083
W1N2	8613.16	1.33544	0.46015	57.4151
W1N3	7559.8	1.21423	0.45788	39.2878
W1N3	7529.08	1.21299	0.43096	38.287
W1N3	7498.36	1.21176	0.40405	37.2862
W1N3	7605.4	1.18909	0.45589	45.9749
W1N3	7574.37	1.18776	0.43974	44.2724
W1N3	7543.34	1.18643	0.42359	42.5698
W2N1	6235.23	1.57665	0.36202	44.4898
W2N1	6132.44	1.5644	0.33945	42.7459
W2N1	6029.64	1.55214	0.31688	41.0021
W2N1	6307.58	1.51203	0.33066	50.1679
W2N1	6099.94	1.45453	0.34769	38.7174
W2N1	6203.76	1.48328	0.33917	44.4427
W2N2	8265.21	1.97264	0.5082	57.0108
W2N2	8080.41	1.94487	0.51594	53.4247
W2N2	7895.62	1.9171	0.52368	49.8387
W2N2	8179.86	1.86781	0.5078	56.5911
W2N2	7993.22	1.82084	0.51424	52.4682
W2N2	7806.58	1.77387	0.52068	48.3452
W2N3	7065.36	1.68139	0.42288	51.1745
W2N3	6982.01	1.67521	0.43934	46.1855
W2N3	6898.65	1.66903	0.4558	41.2165
W2N3	7156.01	1.7018	0.42063	52.8844
W2N3	6987.64	1.65272	0.45872	42.2475
W2N3	7071.83	1.67726	0.43967	47.566
W3N1	5436.2	1.58953	0.33398	42.5576
W3N1	5563.9	1.62687	0.35716	40.0844
W3N1	5691.6	1.66421	0.38035	37.6112
W3N1	5855.52	1.63562	0.36965	41.6554
W3N1	5625.54	1.58641	0.36774	41.7067
W3N1	5395.56	1.5372	0.36582	41.7581
W3N2	6512.69	1.82907	0.48566	44.0432
W3N2	6582.04	1.84291	0.49469	42.5722
W3N2	6651.39	1.85675	0.50373	41.1011
W3N2	6593.82	1.82384	0.504	44.8365
W3N2	6663.86	1.82548	0.49986	44.528
W3N2	6733.9	1.82712	0.49572	44.2195
W3N3	6023.66	1.71924	0.40549	46.3543
W3N3	6073.58	1.78411	0.42196	43.5356
W3N3	6123.5	1.84898	0.43842	40.717
W3N3	6394.73	1.78719	0.45176	43.5174
W3N3	6344.32	1.79054	0.46187	43.5799
W3N3	6293.9	1.79389	0.47197	43.6424
